# Supplementary material for: Syntheses, characterization, and properties of five coordination compounds based on the ligand tetrakis(4-pyridyloxymethylene)methane
Source: Royal Society of Chemistry journal article supplement (doi:10.1039/c3ce42477d), 2014-01-01
Supplement: c3ce42477d1.pdf [file c3ce42477d1.pdf]

## Syntheses, characterizations, and properties of five coordination compounds based on ligand tetrakis (4-pyridyloxymethylene)methane

Zemin Ju, Dapeng Cao, Ling Qin, Chuanlei Zhang, Mingdao Zhang, Zhiqiang Shi and Hegen Zheng\*

\*Fax: 86-25-83314502. E-mail: zhenghg@nju.edu.cn.

*State Key Laboratory of Coordination Chemistry, School of Chemistry and Chemical Engineering, Nanjing National Laboratory of Microstructures, Nanjing University, Nanjing 210093, P. R. China*

**Table S1.** Selected bond lengths (Å) and angles (deg) for compounds **1-5**.

|                                      |            |                   |            |
|--------------------------------------|------------|-------------------|------------|
| Compound 1                           |            |                   |            |
| Cu1 – O2                             | 1.943(4)   | Cu1 – O2          | 2.709(5)   |
| Cu1 – N1                             | 2.014(4)   | Cu1 – O2_e        | 1.943(4)   |
| O2 – Cu1 – O2_e                      | 180.00(1)  | O2_e – Cu1 – N1_e | 89.59(18)  |
| O2 – Cu1 – N1_e                      | 90.41(18)  | O2 – Cu1 – N1     | 89.59(18)  |
| O2_e – Cu1 – N1                      | 90.41(18)  | N1 – Cu1 – N1_e   | 180.00     |
| Symmetry code: e = 1 - x, 1 - y, -z. |            |                   |            |
| Compound 2                           |            |                   |            |
| Zn1 – O2                             | 1.993(4)   | Zn1 – O4          | 2.030(3)   |
| Zn1 – N1                             | 2.057(3)   | Zn1 – N2          | 2.062(3)   |
| O2- Zn1 -O4                          | 142.97(15) | O2- Zn1- N1       | 103.24(16) |
| O4- Zn1- N1                          | 100.02(13) | O2- Zn1- N2       | 104.22(15) |
| O4 -Zn1- N2                          | 101.01(13) | N1 -Zn1- N2       | 97.11(13)  |
| C10- N2- Zn1                         | 120.7(3)   | C6 -N2 -Zn1       | 123.7(3)   |
| C14- O2- Zn1                         | 104.9(3)   | C18- O4- Zn1      | 98.3(3)    |
| C1- N1- Zn1                          | 121.0(3)   | C5- N1- Zn1       | 123.0(3)   |
| Compound 3                           |            |                   |            |
| Cd1-O4                               | 2.317(4)   | Cd1 – O7          | 2.272(3)   |
| Cd1 – N1                             | 2.321(4)   | Cd1 – O4_b        | 2.317(4)   |
| Cd1 –O7_b                            | 2.272(3)   | Cd1 – N1_b        | 2.321(4)   |
| Cd2-O2                               | 2.269(2)   | Cd2-O3            | 2.279(4)   |

|                |            |               |            |
|----------------|------------|---------------|------------|
| Cd2-N2         | 2.361(4)   | Cd2-O2_c      | 2.269(2)   |
| Cd2-O3_c       | 2.279(4)   | Cd2-N2_c      | 2.361(4)   |
| O4-Cd1-O7      | 87.23(12)  | O4-Cd1-N1     | 87.67(13)  |
| O4-Cd1-O4_b    | 97.59(13)  | O4-Cd1-O7_b   | 86.94(12)  |
| O4-Cd1-N1_b    | 174.69(13) | O7-Cd1-N1     | 92.54(12)  |
| O4_b-Cd1-O7    | 86.94(12)  | O7-Cd1-O7_b   | 171.15(14) |
| O7-Cd1-N1_b    | 93.88(12)  | O4_b-Cd1-N1   | 174.69(13) |
| O7_b-Cd1-N1    | 93.88(12)  | N1-Cd1-N1_b   | 87.09(13)  |
| O4_b-Cd1-O7_b  | 87.23(12)  | O4_b-Cd1-N1_b | 87.67(13)  |
| O7_b-Cd1-N1_b  | 92.54(12)  | O2-Cd2-O3     | 89.83(12)  |
| O2-Cd2-N2      | 90.91(11)  | O2-Cd2-O2_c   | 180.00     |
| O2-Cd2-O3_c    | 90.17(12)  | O2-Cd2-N2_c   | 89.10(11)  |
| O3-Cd2-N2      | 94.92(13)  | O2_c-Cd2- -O3 | 90.17(12)  |
| O3-Cd2- -O3_c  | 180.00     | O3-Cd2- -N2_c | 85.08(13)  |
| O2_c-Cd2- N2   | 89.10(11)  | O3_c-Cd2- N2  | 85.08(13)  |
| N2-Cd2- N2_c   | 180.00     | O2_c-Cd2-O3_c | 89.83(12)  |
| O2_c -Cd2-N2_c | 90.91(11)  | O3_c-Cd2-N2_c | 94.92(13)  |

Symmetry codes: b = 1-x, y, 0.5-z; c = -x, -y, 1-z.

#### Compound 4

|                 |            |                 |            |
|-----------------|------------|-----------------|------------|
| Ni1-O1          | 2.0690(16) | Ni1-O3          | 2.0988(15) |
| Ni1 - N1        | 2.1075(19) | Ni1 - O1_f      | 2.0690(16) |
| Ni1 -O3_f       | 2.0988(15) | Ni1 - N1_f      | 2.1075(19) |
| O1 -Ni1 - O3    | 89.14(7)   | O1 -Ni1 - N1    | 89.69(8)   |
| O1 -Ni1 - O1_f  | 180.00     | O1 -Ni1 - O3_f  | 90.86(7)   |
| O1 -Ni1 -N1_f   | 90.31(8)   | O3 -Ni1 - N1    | 87.83(7)   |
| O1_f -Ni1 - O3  | 90.86(7)   | O3 -Ni1 - O3_f  | 180.00     |
| O3 -Ni1 - N1_f  | 92.17(7)   | O1_f -Ni1 -N1   | 90.31(8)   |
| O3_f -Ni1- N1   | 92.17(7)   | N1 -Ni1 -N1_f   | 180.00     |
| O1_f -Ni1 -O3_f | 89.14(7)   | O1_f -Ni1 -N1_f | 89.69(8)   |
| O3_f -Ni1 -N1_f | 87.83(7)   |                 |            |

Symmetry code: f = 0.5 - x, 2.5 - y, 1 - z.

#### Compound 5

|                      |          |                     |            |
|----------------------|----------|---------------------|------------|
| N(1)-Zn(1)#3         | 2.035(4) | C(11)-N(3)-Zn(1)    | 123.7(2)   |
| N(2)-Zn(2)           | 2.048(3) | C(11)#1-N(3)-Zn(1)  | 123.7(2)   |
| N(3)-Zn(1)           | 2.045(4) | C(12)-O(4)-Zn(1)    | 129.3(2)   |
| O(4)-Zn(1)           | 1.916(2) | N(4)-O(6)-Zn(2)     | 129.7(3)   |
| O(6)-Zn(2)           | 2.046(3) | O(4)-Zn(1)-O(4)#1   | 121.06(16) |
| C(19)-N(1)-C(19)#1   | 117.1(4) | O(4)-Zn(1)-N(1)#3   | 114.19(8)  |
| C(19)#1-N(1)-Zn(1)#3 | 121.2(2) | O(4)#1-Zn(1)-N(1)#3 | 114.19(8)  |

|                     |            |                   |            |
|---------------------|------------|-------------------|------------|
| C(5)-N(2)-Zn(2)     | 119.3(2)   | O(4)-Zn(1)-N(3)   | 100.41(10) |
| C(6)-N(2)-Zn(2)     | 124.0(2)   | O(4)#1-Zn(1)-N(3) | 100.41(10) |
| N(1)#3-Zn(1)-N(3)   | 102.08(16) | O(6)-Zn(2)-N(2)   | 117.34(12) |
| O(6)-Zn(2)-O(6)#2   | 108.79(17) | O(6)#2-Zn(2)-N(2) | 107.96(12) |
| O(6)-Zn(2)-N(2)#2   | 107.96(12) | N(2)#2-Zn(2)-N(2) | 97.51(16)  |
| O(6)#2-Zn(2)-N(2)#2 | 117.34(12) |                   |            |

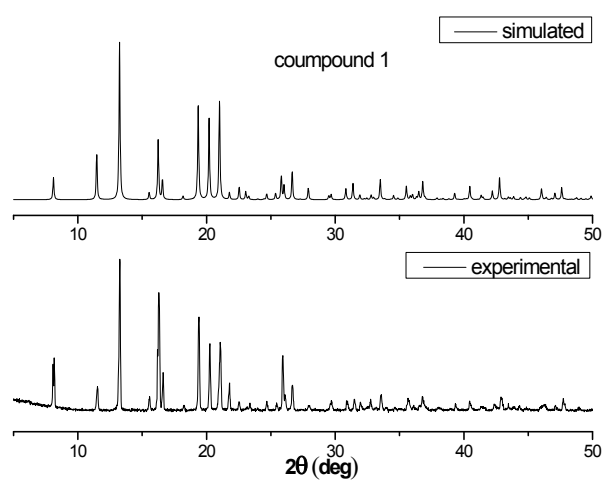

**Figure S1.** Powder x-ray diffraction patterns of compound 1

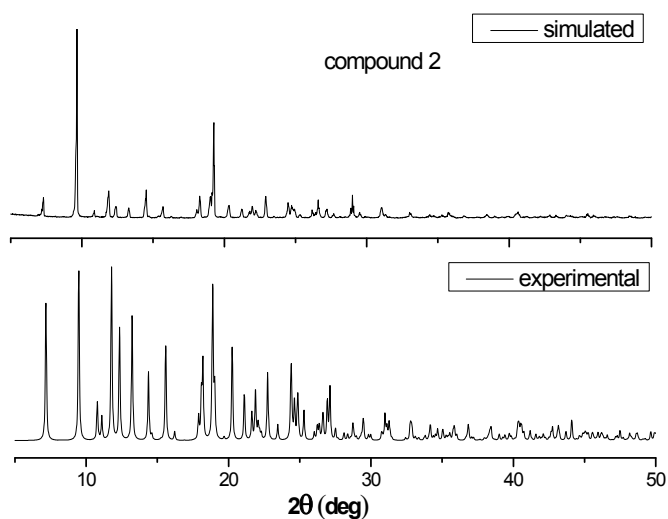

**Figure S2.** Powder x-ray diffraction patterns of compound 2

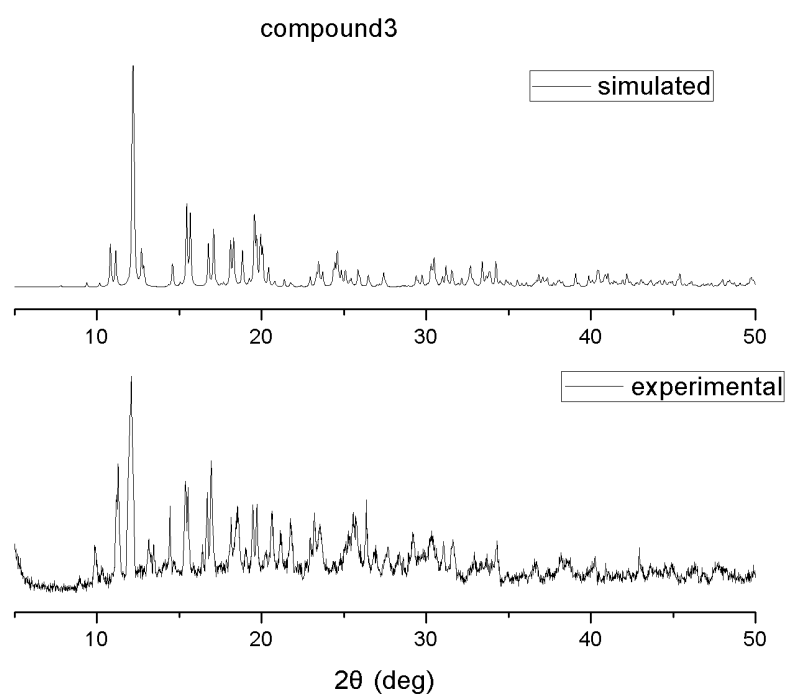

**Figure S3.** Powder x-ray diffraction patterns of compound 3

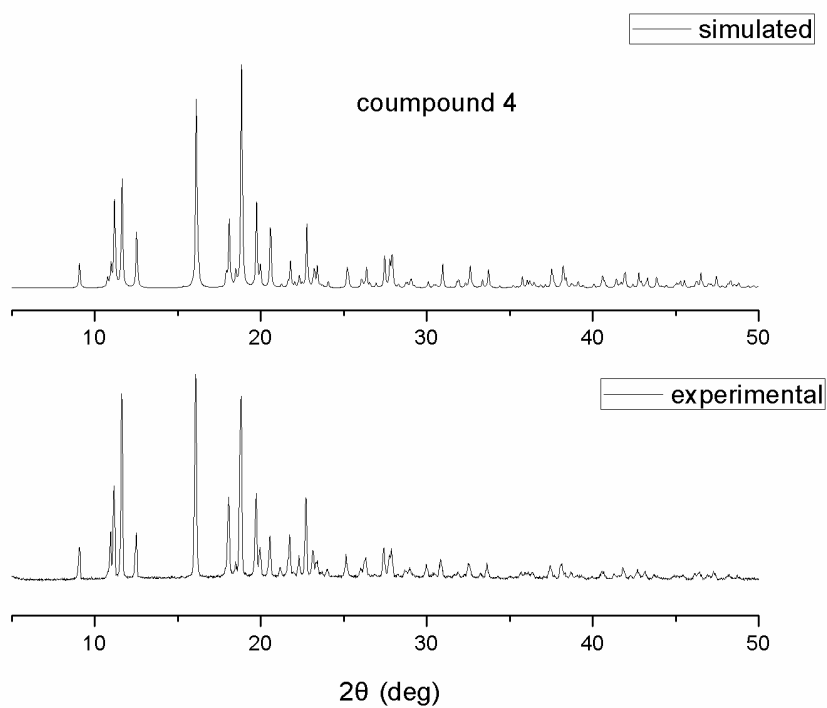

**Figure S4.** Powder x-ray diffraction patterns of compound4

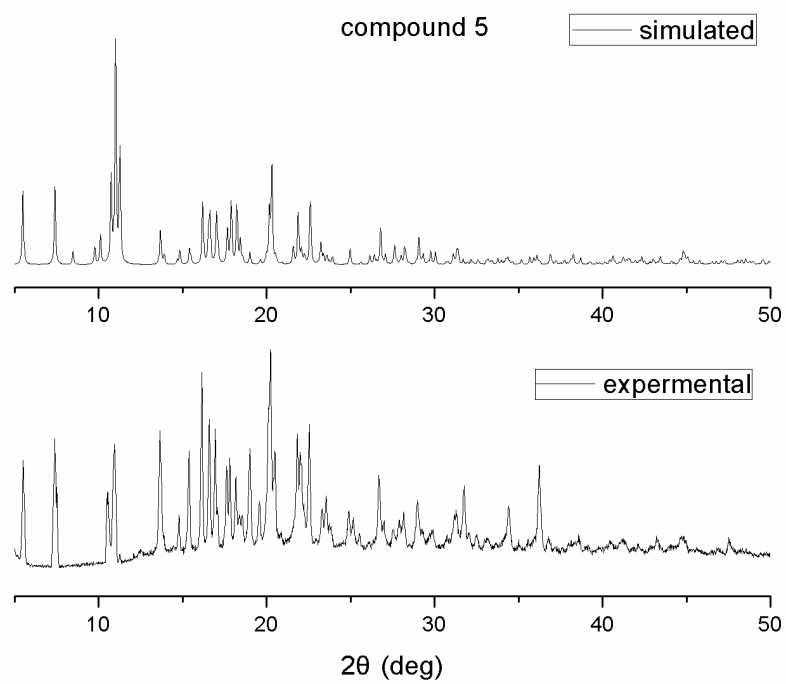

**Figure S5.** Powder x-ray diffraction patterns of compound 5
